# Supplementary material for: Estimating the activity of transcription factors by the effect on their target genes
Source: PubMed Central journal article supplement — Bioinformatics. 2014 Aug 22;30(17):i401–7. doi: 10.1093/bioinformatics/btu446 (PMC4147899; doi:10.1093/bioinformatics/btu446), 2014-08-22
Supplement: supp_btu446_Schacht_Supplementary_material_revised_final.pdf [file supp_btu446_Schacht_Supplementary_material_revised_final.pdf]

# Estimating the activity of transcription factors by the effect on their target genes

Theresa Schacht, Marcus Oswald, Roland Eils, Stefan B. Eichmüller,  
Rainer König

## Supplementary Material

### Supplementary Figures

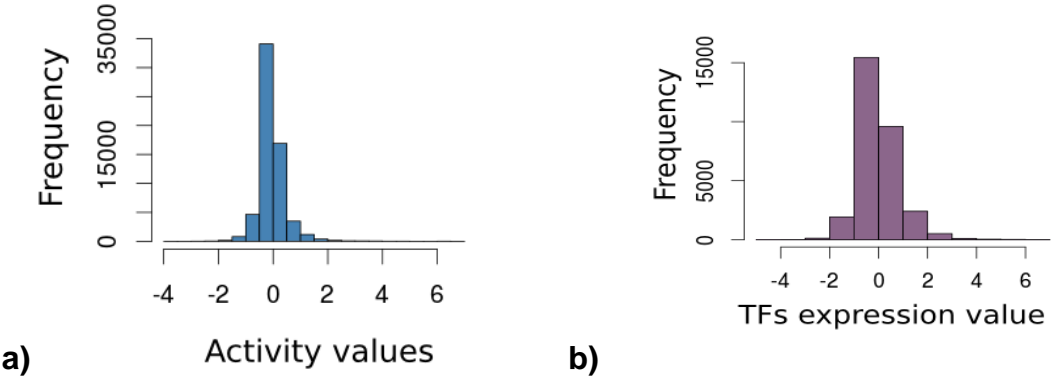

**Figure S1:** Distribution of activity (a) and TF-gene expression (b) over all transcription factors and investigated cell lines from the analyzed NCI-60 panel.

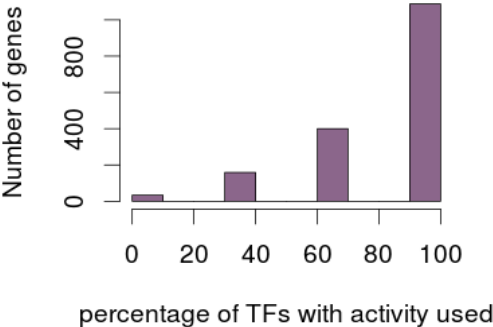

**Figure S2:** Most of the transcription factors were modelled using the activity definition when employing the model switch (here for 1682 target genes).

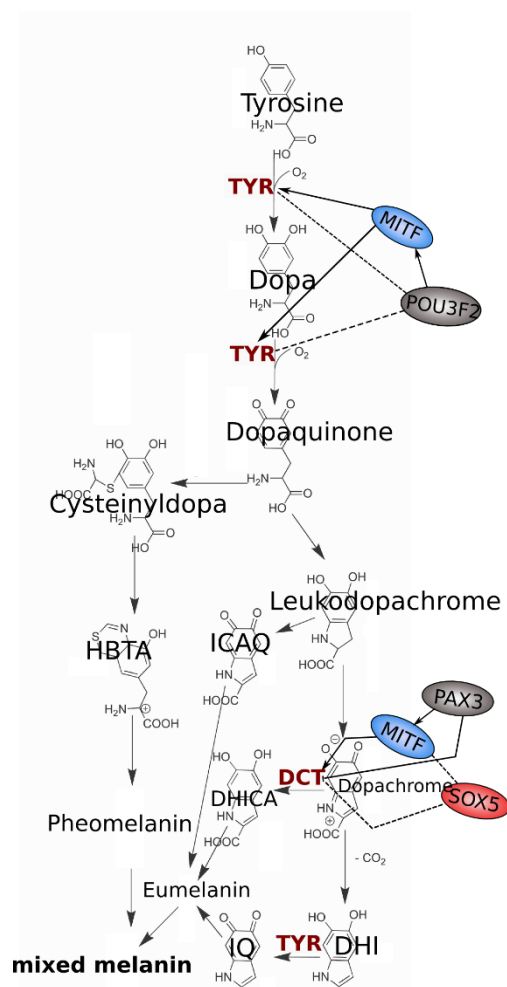

**Figure S3: Melanogenesis and its regulators.** TYR and DCT are the key enzymes of melanogenesis and they are regulated by MITF, POU3F2, PAX3 and SOX5. Melanocytes contain the skin pigment melanin produced by melanogenesis. This distinguishes them from the other analyzed cells. Genes TYR and DCT were highly up-regulated in the melanocytes of the NCI-60 panel. Melanin synthesis starts from tyrosine, processed by the pacemaker enzyme tyrosinase (TYR) which catalyzes the first two rate-limiting steps of melanin synthesis. Dopaquinone is transformed by autooxidation into dopachrome via leukodopachrome. Subsequent oxidation of dopachrome results in 5,6-dihydroxyindole (DHI) which is then further oxidized to indole-5,6-quinone (IQ) catalyzed by tyrosinase. Tyrosinase-related protein 2 (TRP2), also known as dopachrome tautomerase (DCT), converts dopachrome to 5,6-dihydroxyindole-2-carboxylic acid (DHICA) from which indole-2-carboxylic acid-5,6quinone (ICAQ) is produced using TRP1. Finally, oxidative polymerisation of IQ, DHICA and ICAQ leads to eumelanin. In the presence of glutathione or cysteine, dopaquinone can react with those amino acids yielding glutathionyldopa or cysteinyldopa, which are then further oxidized to 5-hydroxy 1,4-benzothiazinylalanine (HBTA). Pheomelanin is produced by oxidative polymerisation of HBTA (Chang, 2009). Under standard conditions, melanocytes produce eumelanin as well as pheomelanin resulting in a mixture of both melanin types (Lin and Fisher, 2007). The figure was produced according to the information from (Chang, 2009) using ChemBio Draw Ultra ([www.cambridgesoft.com](http://www.cambridgesoft.com)).

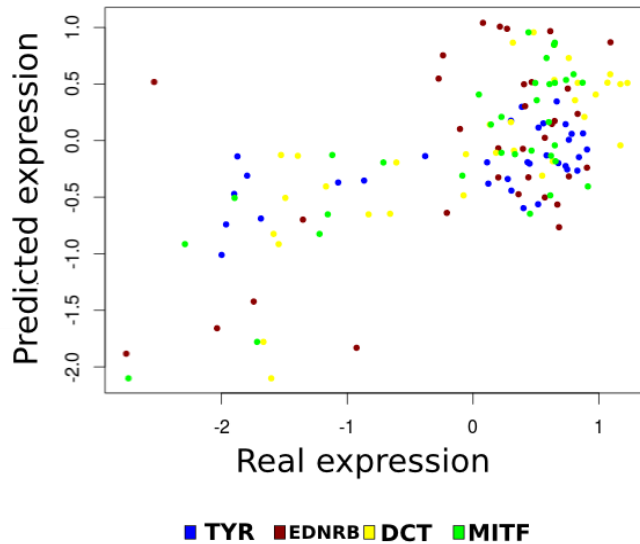

**Figure S4:** Scatterplot of predicted and measured transcript levels. For the four genes TYR, DCT, EDNRB and MITF the gene expression values were predicted for the 33 melanoma cell lines, which were not used for learning the model (fixed  $\beta$ -coefficients, learned from the data of the NCI-60 panel). Average of Pearson's correlation between all predicted and measured expression values was  $r=0.64$ .

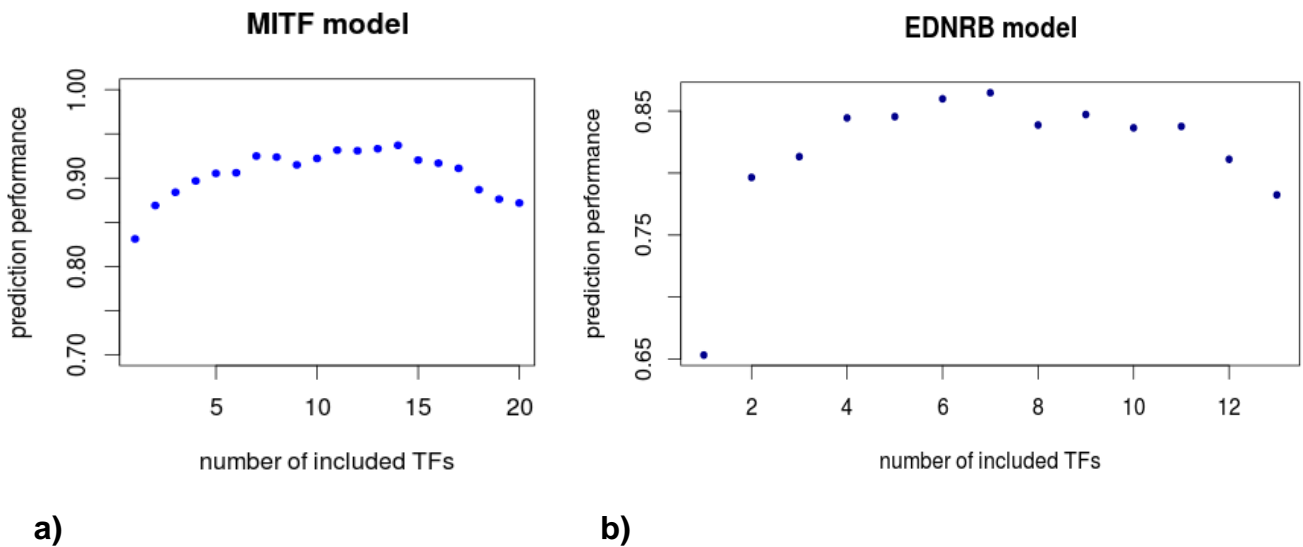

**Figure S5:** Tracking the prediction performance bottom-up to investigate the tendency of overfitting. For the genes a) MITF and b) EDNRB regulation models were set up to predict their gene expression. We constrained the models by the number of included TFs (betas unequal to zero) from 1 to the number of all putative TFs. The prediction performance was calculated using a leave-one-out cross-validation. Raising the number of non-zero betas improves the prediction performance until a plateau is reached, and the performance final decreases (overfitted model for higher numbers of non-zero betas).

## Supplementary Method 1:

To restrict the number of parameters ( $\beta_t$ ) for a model, further constraints were added. Each possible TF of a target gene (for which the model was set up) got a binary coefficient  $x_i$ , in addition to the TF's beta-coefficients. If the binary coefficient equaled zero, the according beta was forced to be zero and TF was not used for this model (formulas 2 and 3, below). For  $n$  possible regulators, the sum of the binary coefficients was set to  $r$  (formula 1). In our study, we used  $r = 6$  (and  $r = 3$  for analysis of section 3.4). A fixed variable called "Big M" with  $M = 1000$  was needed to fulfill these criteria. Note that  $M$  was chosen large enough to not restrict the search space.

$$x_1 + x_2 + \dots + x_n = r \quad (1)$$

$$\beta_i - M \cdot x_i \leq 0 \quad (2)$$

$$\beta_i + M \cdot x_i \geq 0 \quad \text{for all } i = 1, \dots, n \quad (3)$$

## References

Chang, T.S. (2009) An updated review of tyrosinase inhibitors, *International journal of molecular sciences*, **10**, 2440-2475.

Lin, J.Y. and Fisher, D.E. (2007) Melanocyte biology and skin pigmentation, *Nature*, **445**, 843-850.

**Supplementary Table S1**

| TF                | Number activity | Number gene expression | Total number | % Activity | Mean PCC r |
|-------------------|-----------------|------------------------|--------------|------------|------------|
| ELK4              | 1               | 0                      | 1            | 100        | 0.25       |
| SATB1             | 3               | 0                      | 3            | 100        | 0.34       |
| HNF4G             | 2               | 0                      | 2            | 100        | 0.41       |
| HIC1              | 2               | 0                      | 2            | 100        | 0.44       |
| NEUROD1           | 3               | 0                      | 3            | 100        | 0.44       |
| ETV6              | 1               | 0                      | 1            | 100        | 0.44       |
| NR2C2             | 2               | 0                      | 2            | 100        | 0.44       |
| FOXA1,FOXA2,FOXA3 | 2               | 0                      | 2            | 100        | 0.46       |
| DMRT1             | 1               | 0                      | 1            | 100        | 0.47       |
| STAT4             | 6               | 0                      | 6            | 100        | 0.48       |
| GMNN              | 1               | 0                      | 1            | 100        | 0.49       |
| SRY               | 1               | 0                      | 1            | 100        | 0.49       |
| FOXA1             | 6               | 0                      | 6            | 100        | 0.5        |
| HNF4A,HNF4G       | 3               | 0                      | 3            | 100        | 0.5        |
| HOXC6             | 1               | 0                      | 1            | 100        | 0.5        |
| NFYB              | 6               | 0                      | 6            | 100        | 0.5        |
| STAT5A,STAT5B     | 6               | 0                      | 6            | 100        | 0.5        |
| ZNF148            | 7               | 0                      | 7            | 100        | 0.51       |
| PDX1              | 5               | 0                      | 5            | 100        | 0.51       |
| NR2F1,NR2F2       | 2               | 0                      | 2            | 100        | 0.51       |
| MXD1              | 1               | 0                      | 1            | 100        | 0.51       |
| NR5A2             | 5               | 0                      | 5            | 100        | 0.52       |
| NR0B2             | 2               | 0                      | 2            | 100        | 0.52       |
| GF11              | 8               | 0                      | 8            | 100        | 0.52       |
| MECOM             | 2               | 0                      | 2            | 100        | 0.52       |
| TFCP2             | 3               | 0                      | 3            | 100        | 0.52       |
| PKNOX1            | 1               | 0                      | 1            | 100        | 0.52       |
| ESRRB             | 2               | 0                      | 2            | 100        | 0.53       |
| SP1,SP3           | 5               | 0                      | 5            | 100        | 0.53       |
| HOXA13            | 3               | 0                      | 3            | 100        | 0.53       |
| REL,RELA          | 5               | 0                      | 5            | 100        | 0.53       |
| MESP1             | 5               | 0                      | 5            | 100        | 0.53       |
| ELF1              | 6               | 0                      | 6            | 100        | 0.53       |
| PAX2              | 1               | 0                      | 1            | 100        | 0.53       |
| HCFC1             | 1               | 0                      | 1            | 100        | 0.54       |
| CEBPG             | 11              | 0                      | 11           | 100        | 0.54       |
| SIX1              | 4               | 0                      | 4            | 100        | 0.54       |
| GLI3              | 4               | 0                      | 4            | 100        | 0.55       |
| NFE2              | 1               | 0                      | 1            | 100        | 0.56       |
| PITX2             | 4               | 0                      | 4            | 100        | 0.56       |
| MTA1              | 3               | 0                      | 3            | 100        | 0.56       |
| RXRβ              | 2               | 0                      | 2            | 100        | 0.56       |
| NR4A2             | 5               | 0                      | 5            | 100        | 0.56       |
| PPARα,RXRα        | 3               | 0                      | 3            | 100        | 0.56       |

|                                 |   |   |   |     |      |
|---------------------------------|---|---|---|-----|------|
| AHR                             | 5 | 0 | 5 | 100 | 0.57 |
| FOS,JUN                         | 4 | 0 | 4 | 100 | 0.57 |
| TFEB                            | 2 | 0 | 2 | 100 | 0.57 |
| LHX2                            | 7 | 0 | 7 | 100 | 0.57 |
| MSX2                            | 2 | 0 | 2 | 100 | 0.57 |
| TBX21                           | 8 | 0 | 8 | 100 | 0.57 |
| PURA                            | 3 | 0 | 3 | 100 | 0.58 |
| EPAS1                           | 7 | 0 | 7 | 100 | 0.58 |
| SIM2                            | 2 | 0 | 2 | 100 | 0.58 |
| RARA,RAR<br>B,RARG              | 2 | 0 | 2 | 100 | 0.59 |
| MYBL2                           | 6 | 0 | 6 | 100 | 0.59 |
| LEF1,TCF7,<br>TCF7L1,TC<br>F7L2 | 8 | 0 | 8 | 100 | 0.59 |
| ESR1,ESR<br>2                   | 4 | 0 | 4 | 100 | 0.59 |
| DBP                             | 4 | 0 | 4 | 100 | 0.59 |
| NAB2                            | 2 | 0 | 2 | 100 | 0.59 |
| RUNX1,RU<br>NX1T1               | 6 | 0 | 6 | 100 | 0.6  |
| FOSL1,JUN                       | 4 | 0 | 4 | 100 | 0.6  |
| TLX3                            | 2 | 0 | 2 | 100 | 0.6  |
| FOXC1                           | 2 | 0 | 2 | 100 | 0.6  |
| PBX1,PKN<br>OX1                 | 2 | 0 | 2 | 100 | 0.61 |
| ONECUT1                         | 6 | 0 | 6 | 100 | 0.61 |
| MBD1                            | 4 | 0 | 4 | 100 | 0.61 |
| GLI1                            | 7 | 0 | 7 | 100 | 0.61 |
| SMAD2                           | 4 | 0 | 4 | 100 | 0.61 |
| HHEX                            | 2 | 0 | 2 | 100 | 0.61 |
| USF1,USF2                       | 4 | 0 | 4 | 100 | 0.61 |
| RXRA,THR<br>B                   | 3 | 0 | 3 | 100 | 0.61 |
| ZKSCAN3                         | 3 | 0 | 3 | 100 | 0.61 |
| IRF5                            | 4 | 0 | 4 | 100 | 0.61 |
| POU2F3                          | 1 | 0 | 1 | 100 | 0.62 |
| KLF13                           | 1 | 0 | 1 | 100 | 0.62 |
| BATF                            | 4 | 0 | 4 | 100 | 0.62 |
| IRF2                            | 7 | 0 | 7 | 100 | 0.62 |
| POU2AF1                         | 2 | 0 | 2 | 100 | 0.62 |
| NR1H2                           | 2 | 0 | 2 | 100 | 0.62 |
| MTF2                            | 3 | 0 | 3 | 100 | 0.62 |
| NFYC                            | 5 | 0 | 5 | 100 | 0.62 |
| NFATC3                          | 6 | 0 | 6 | 100 | 0.63 |
| MEF2C                           | 8 | 0 | 8 | 100 | 0.63 |
| SIX4                            | 2 | 0 | 2 | 100 | 0.63 |
| ZBTB33                          | 2 | 0 | 2 | 100 | 0.63 |
| FEV                             | 3 | 0 | 3 | 100 | 0.63 |
| CDX1                            | 2 | 0 | 2 | 100 | 0.63 |
| VAX2                            | 1 | 0 | 1 | 100 | 0.64 |
| MSX1                            | 1 | 0 | 1 | 100 | 0.64 |
| FOXO4                           | 2 | 0 | 2 | 100 | 0.64 |
| NR2F6                           | 6 | 0 | 6 | 100 | 0.64 |

|                         |    |   |    |     |      |
|-------------------------|----|---|----|-----|------|
| BCL6                    | 7  | 0 | 7  | 100 | 0.65 |
| EGR3                    | 5  | 0 | 5  | 100 | 0.65 |
| HNF1A,HN<br>F1B         | 6  | 0 | 6  | 100 | 0.65 |
| NR1H3,RX<br>RA          | 9  | 0 | 9  | 100 | 0.65 |
| KLF6                    | 4  | 0 | 4  | 100 | 0.65 |
| POU3F4                  | 3  | 0 | 3  | 100 | 0.65 |
| CBFB                    | 4  | 0 | 4  | 100 | 0.65 |
| ATF2                    | 8  | 0 | 8  | 100 | 0.65 |
| PBX2                    | 3  | 0 | 3  | 100 | 0.65 |
| OLIG2                   | 3  | 0 | 3  | 100 | 0.66 |
| POU4F2                  | 1  | 0 | 1  | 100 | 0.66 |
| ZNF217                  | 4  | 0 | 4  | 100 | 0.66 |
| ATF3                    | 5  | 0 | 5  | 100 | 0.66 |
| NFAT5                   | 4  | 0 | 4  | 100 | 0.66 |
| ETV1                    | 6  | 0 | 6  | 100 | 0.66 |
| LHX3                    | 2  | 0 | 2  | 100 | 0.66 |
| NEUROG3                 | 2  | 0 | 2  | 100 | 0.66 |
| FOXP1                   | 10 | 0 | 10 | 100 | 0.67 |
| NFKB2,REL<br>B          | 3  | 0 | 3  | 100 | 0.67 |
| NR1H4                   | 6  | 0 | 6  | 100 | 0.67 |
| FOXL2                   | 7  | 0 | 7  | 100 | 0.67 |
| SPDEF                   | 3  | 0 | 3  | 100 | 0.67 |
| HOXA9                   | 2  | 0 | 2  | 100 | 0.67 |
| SOX9                    | 15 | 0 | 15 | 100 | 0.67 |
| ASCL2                   | 3  | 0 | 3  | 100 | 0.67 |
| KCNIP3                  | 1  | 0 | 1  | 100 | 0.67 |
| GABPB1                  | 3  | 0 | 3  | 100 | 0.67 |
| ZNF350                  | 1  | 0 | 1  | 100 | 0.67 |
| BHLHE40                 | 2  | 0 | 2  | 100 | 0.67 |
| E2F2                    | 6  | 0 | 6  | 100 | 0.67 |
| POU1F1                  | 3  | 0 | 3  | 100 | 0.67 |
| GATA3                   | 7  | 0 | 7  | 100 | 0.67 |
| NR1H3                   | 4  | 0 | 4  | 100 | 0.68 |
| DACH1                   | 4  | 0 | 4  | 100 | 0.68 |
| GTF2I                   | 4  | 0 | 4  | 100 | 0.68 |
| NKX3-1                  | 6  | 0 | 6  | 100 | 0.68 |
| SMAD5                   | 7  | 0 | 7  | 100 | 0.68 |
| EHF                     | 7  | 0 | 7  | 100 | 0.68 |
| PHOX2A                  | 3  | 0 | 3  | 100 | 0.68 |
| NFE2L1                  | 3  | 0 | 3  | 100 | 0.69 |
| NR1I3                   | 4  | 0 | 4  | 100 | 0.69 |
| MTF1                    | 3  | 0 | 3  | 100 | 0.69 |
| ZEB2                    | 6  | 0 | 6  | 100 | 0.69 |
| NFIA,NFIB,<br>NFIC,NFIX | 4  | 0 | 4  | 100 | 0.69 |
| NKX2-5                  | 1  | 0 | 1  | 100 | 0.69 |
| RREB1                   | 2  | 0 | 2  | 100 | 0.7  |
| FOXC1,FO<br>XC2         | 1  | 0 | 1  | 100 | 0.7  |
| ESRRG                   | 4  | 0 | 4  | 100 | 0.7  |
| NR1H2,RX                | 1  | 0 | 1  | 100 | 0.7  |

|                |    |   |    |     |      |
|----------------|----|---|----|-----|------|
| RA             |    |   |    |     |      |
| DMTF1          | 5  | 0 | 5  | 100 | 0.7  |
| ERF            | 3  | 0 | 3  | 100 | 0.7  |
| FO XK1         | 1  | 0 | 1  | 100 | 0.7  |
| E2F5           | 3  | 0 | 3  | 100 | 0.7  |
| MEIS2          | 4  | 0 | 4  | 100 | 0.7  |
| LDB1           | 6  | 0 | 6  | 100 | 0.7  |
| VDR            | 15 | 0 | 15 | 100 | 0.7  |
| ARNT2          | 3  | 0 | 3  | 100 | 0.7  |
| RORC           | 2  | 0 | 2  | 100 | 0.7  |
| KLF2           | 3  | 0 | 3  | 100 | 0.7  |
| TBX1           | 2  | 0 | 2  | 100 | 0.7  |
| MLL            | 3  | 0 | 3  | 100 | 0.7  |
| NR3C2          | 2  | 0 | 2  | 100 | 0.7  |
| YAP1           | 5  | 0 | 5  | 100 | 0.7  |
| NR2E1          | 3  | 0 | 3  | 100 | 0.71 |
| LMX1B          | 1  | 0 | 1  | 100 | 0.71 |
| SIX3           | 1  | 0 | 1  | 100 | 0.71 |
| LMX1A          | 1  | 0 | 1  | 100 | 0.71 |
| KLF11          | 3  | 0 | 3  | 100 | 0.71 |
| ELF4           | 6  | 0 | 6  | 100 | 0.71 |
| CITED2         | 5  | 0 | 5  | 100 | 0.71 |
| HOXC8          | 2  | 0 | 2  | 100 | 0.71 |
| SP4            | 3  | 0 | 3  | 100 | 0.71 |
| ATOH1          | 3  | 0 | 3  | 100 | 0.71 |
| YBX1           | 5  | 0 | 5  | 100 | 0.71 |
| CHUK           | 3  | 0 | 3  | 100 | 0.72 |
| SOX17          | 3  | 0 | 3  | 100 | 0.72 |
| NHLH2          | 2  | 0 | 2  | 100 | 0.72 |
| NR4A1          | 4  | 0 | 4  | 100 | 0.72 |
| RFX2           | 1  | 0 | 1  | 100 | 0.72 |
| SMARCA5        | 4  | 0 | 4  | 100 | 0.72 |
| E2F8           | 1  | 0 | 1  | 100 | 0.72 |
| SOX11          | 2  | 0 | 2  | 100 | 0.72 |
| PTF1A          | 1  | 0 | 1  | 100 | 0.72 |
| NR1I2,RXR<br>A | 1  | 0 | 1  | 100 | 0.72 |
| CREB3          | 1  | 0 | 1  | 100 | 0.72 |
| RFX1           | 1  | 0 | 1  | 100 | 0.72 |
| ASH2L          | 4  | 0 | 4  | 100 | 0.72 |
| EGR2           | 4  | 0 | 4  | 100 | 0.72 |
| LITAF          | 3  | 0 | 3  | 100 | 0.72 |
| CHD8           | 1  | 0 | 1  | 100 | 0.72 |
| NRL            | 1  | 0 | 1  | 100 | 0.72 |
| JDP2           | 4  | 0 | 4  | 100 | 0.73 |
| PHF1           | 1  | 0 | 1  | 100 | 0.73 |
| MLL4           | 1  | 0 | 1  | 100 | 0.73 |
| NKX6-1         | 3  | 0 | 3  | 100 | 0.73 |
| SATB2          | 2  | 0 | 2  | 100 | 0.73 |
| NR1H4,RX<br>RA | 2  | 0 | 2  | 100 | 0.73 |
| HOXB9          | 5  | 0 | 5  | 100 | 0.73 |
| NR1I2          | 3  | 0 | 3  | 100 | 0.73 |
| DNAJC2         | 2  | 0 | 2  | 100 | 0.73 |



|                                   |   |   |   |     |      |
|-----------------------------------|---|---|---|-----|------|
| MZF1                              | 4 | 0 | 4 | 100 | 0.73 |
| PROX1                             | 6 | 0 | 6 | 100 | 0.73 |
| CREB3L3                           | 6 | 0 | 6 | 100 | 0.73 |
| NRF1                              | 2 | 0 | 2 | 100 | 0.73 |
| NFAT5,NFATC1,NFATC2,NFATC3,NFATC4 | 1 | 0 | 1 | 100 | 0.73 |
| SOX4                              | 2 | 0 | 2 | 100 | 0.74 |
| TCF21                             | 3 | 0 | 3 | 100 | 0.74 |
| BARX2                             | 2 | 0 | 2 | 100 | 0.74 |
| IRF7                              | 3 | 0 | 3 | 100 | 0.74 |
| RXRA,THRA                         | 2 | 0 | 2 | 100 | 0.74 |
| ARNTL2                            | 3 | 0 | 3 | 100 | 0.74 |
| CSDA                              | 4 | 0 | 4 | 100 | 0.74 |
| IRF9                              | 2 | 0 | 2 | 100 | 0.74 |
| NCOA2                             | 3 | 0 | 3 | 100 | 0.74 |
| ZBTB7B                            | 4 | 0 | 4 | 100 | 0.74 |
| E2F1,TFDP1                        | 3 | 0 | 3 | 100 | 0.75 |
| ERG,EWSR1                         | 1 | 0 | 1 | 100 | 0.75 |
| TFAP4                             | 7 | 0 | 7 | 100 | 0.75 |
| DLX5                              | 2 | 0 | 2 | 100 | 0.75 |
| FOSL2,JUN D                       | 3 | 0 | 3 | 100 | 0.75 |
| NFKB2                             | 3 | 0 | 3 | 100 | 0.75 |
| KLF3                              | 1 | 0 | 1 | 100 | 0.75 |
| PAX3                              | 7 | 0 | 7 | 100 | 0.75 |
| KLF10                             | 4 | 0 | 4 | 100 | 0.75 |
| GTF2IRD1                          | 3 | 0 | 3 | 100 | 0.75 |
| ETV2                              | 3 | 0 | 3 | 100 | 0.76 |
| NCOA1                             | 3 | 0 | 3 | 100 | 0.76 |
| PML                               | 3 | 0 | 3 | 100 | 0.76 |
| FOSL2,JUN                         | 3 | 0 | 3 | 100 | 0.76 |
| ZFHX3                             | 2 | 0 | 2 | 100 | 0.76 |
| FOXO1,PAX3                        | 2 | 0 | 2 | 100 | 0.76 |
| NPAS2                             | 2 | 0 | 2 | 100 | 0.76 |
| ATF5                              | 3 | 0 | 3 | 100 | 0.76 |
| MYF6                              | 3 | 0 | 3 | 100 | 0.76 |
| WDR5                              | 2 | 0 | 2 | 100 | 0.76 |
| MEF2D                             | 5 | 0 | 5 | 100 | 0.76 |
| THRA,THRB                         | 1 | 0 | 1 | 100 | 0.77 |
| DLX3                              | 2 | 0 | 2 | 100 | 0.77 |
| NR1D2                             | 4 | 0 | 4 | 100 | 0.77 |
| FOSL1,JUN B                       | 1 | 0 | 1 | 100 | 0.77 |
| CTCF                              | 4 | 0 | 4 | 100 | 0.77 |
| FOXE1                             | 2 | 0 | 2 | 100 | 0.77 |
| SPIB                              | 2 | 0 | 2 | 100 | 0.78 |
| T                                 | 2 | 0 | 2 | 100 | 0.78 |

|                    |    |   |    |      |      |
|--------------------|----|---|----|------|------|
| MED1               | 2  | 0 | 2  | 100  | 0.78 |
| OLIG1              | 4  | 0 | 4  | 100  | 0.78 |
| TCF4               | 6  | 0 | 6  | 100  | 0.78 |
| ONECUT2            | 3  | 0 | 3  | 100  | 0.79 |
| TCF12              | 2  | 0 | 2  | 100  | 0.79 |
| STAT2              | 2  | 0 | 2  | 100  | 0.79 |
| SP2                | 1  | 0 | 1  | 100  | 0.8  |
| PAX7               | 1  | 0 | 1  | 100  | 0.8  |
| ISL1               | 3  | 0 | 3  | 100  | 0.8  |
| EN1                | 1  | 0 | 1  | 100  | 0.8  |
| BCL3               | 4  | 0 | 4  | 100  | 0.81 |
| TCF15              | 1  | 0 | 1  | 100  | 0.81 |
| ARX                | 1  | 0 | 1  | 100  | 0.81 |
| SP7                | 2  | 0 | 2  | 100  | 0.81 |
| ELK3               | 2  | 0 | 2  | 100  | 0.82 |
| SOX15              | 1  | 0 | 1  | 100  | 0.82 |
| MYF5               | 1  | 0 | 1  | 100  | 0.82 |
| SOX7               | 1  | 0 | 1  | 100  | 0.83 |
| RXRG               | 1  | 0 | 1  | 100  | 0.83 |
| BACH1              | 1  | 0 | 1  | 100  | 0.83 |
| LMO4               | 3  | 0 | 3  | 100  | 0.84 |
| XBP1               | 1  | 0 | 1  | 100  | 0.84 |
| KLF9               | 1  | 0 | 1  | 100  | 0.84 |
| FOXD3              | 1  | 0 | 1  | 100  | 0.85 |
| MLL,MLLT1          | 1  | 0 | 1  | 100  | 0.85 |
| FOXN1              | 1  | 0 | 1  | 100  | 0.86 |
| NR6A1              | 1  | 0 | 1  | 100  | 0.87 |
| SOX5               | 3  | 0 | 3  | 100  | 0.89 |
| TBX5               | 1  | 0 | 1  | 100  | 0.9  |
| RFX5               | 1  | 0 | 1  | 100  | 0.93 |
| CEBPD              | 19 | 1 | 20 | 95   | 0.57 |
| RARA               | 16 | 1 | 17 | 94.1 | 0.66 |
| RXRA               | 13 | 1 | 14 | 92.9 | 0.53 |
| STAT5B             | 13 | 1 | 14 | 92.9 | 0.56 |
| SMAD3              | 13 | 1 | 14 | 92.9 | 0.57 |
| RBPJ               | 13 | 1 | 14 | 92.9 | 0.59 |
| REL                | 13 | 1 | 14 | 92.9 | 0.69 |
| FOSB               | 12 | 1 | 13 | 92.3 | 0.53 |
| TWIST1             | 12 | 1 | 13 | 92.3 | 0.64 |
| TCF3               | 11 | 1 | 12 | 91.7 | 0.68 |
| REST               | 11 | 1 | 12 | 91.7 | 0.68 |
| NFYA               | 10 | 1 | 11 | 90.9 | 0.61 |
| PPARA,RX<br>RA     | 10 | 1 | 11 | 90.9 | 0.63 |
| FOS                | 19 | 2 | 21 | 90.5 | 0.59 |
| MYB                | 9  | 1 | 10 | 90   | 0.56 |
| TP53               | 63 | 7 | 70 | 90   | 0.6  |
| USF2               | 9  | 1 | 10 | 90   | 0.61 |
| TFAP2D             | 9  | 1 | 10 | 90   | 0.61 |
| NFYA,NFY<br>B,NFYC | 9  | 1 | 10 | 90   | 0.63 |
| SNAI1              | 9  | 1 | 10 | 90   | 0.69 |
| NR2F1              | 9  | 1 | 10 | 90   | 0.69 |
| TFAP2E             | 8  | 1 | 9  | 88.9 | 0.46 |

|                                           |    |   |    |      |      |
|-------------------------------------------|----|---|----|------|------|
| PAX6                                      | 8  | 1 | 9  | 88.9 | 0.53 |
| IRF8                                      | 8  | 1 | 9  | 88.9 | 0.57 |
| SMAD4                                     | 16 | 2 | 18 | 88.9 | 0.6  |
| WT1                                       | 16 | 2 | 18 | 88.9 | 0.61 |
| ATF1                                      | 8  | 1 | 9  | 88.9 | 0.61 |
| KLF4                                      | 16 | 2 | 18 | 88.9 | 0.64 |
| PGR                                       | 8  | 1 | 9  | 88.9 | 0.66 |
| STAT6                                     | 8  | 1 | 9  | 88.9 | 0.66 |
| IKZF1                                     | 8  | 1 | 9  | 88.9 | 0.68 |
| ZEB1                                      | 8  | 1 | 9  | 88.9 | 0.76 |
| CEBPA                                     | 23 | 3 | 26 | 88.5 | 0.58 |
| JUN                                       | 30 | 4 | 34 | 88.2 | 0.64 |
| MYOD1                                     | 7  | 1 | 8  | 87.5 | 0.55 |
| GATA1                                     | 21 | 3 | 24 | 87.5 | 0.57 |
| GATA6                                     | 7  | 1 | 8  | 87.5 | 0.57 |
| CUX1                                      | 7  | 1 | 8  | 87.5 | 0.6  |
| SMAD1                                     | 7  | 1 | 8  | 87.5 | 0.61 |
| ETV5                                      | 7  | 1 | 8  | 87.5 | 0.61 |
| NFIB                                      | 7  | 1 | 8  | 87.5 | 0.62 |
| ATF4                                      | 7  | 1 | 8  | 87.5 | 0.66 |
| HMGA1                                     | 7  | 1 | 8  | 87.5 | 0.66 |
| FLI1                                      | 7  | 1 | 8  | 87.5 | 0.66 |
| ESR2                                      | 21 | 3 | 24 | 87.5 | 0.66 |
| E2F4                                      | 7  | 1 | 8  | 87.5 | 0.68 |
| TCF7L2                                    | 19 | 3 | 22 | 86.4 | 0.64 |
| ARNT2,HIF<br>1A                           | 6  | 1 | 7  | 85.7 | 0.44 |
| MBD2                                      | 6  | 1 | 7  | 85.7 | 0.5  |
| RARA,RXR<br>A                             | 6  | 1 | 7  | 85.7 | 0.61 |
| CEBPA,CE<br>BPB,CEBP<br>D,CEBPE,C<br>EBPG | 6  | 1 | 7  | 85.7 | 0.61 |
| SOX2                                      | 36 | 6 | 42 | 85.7 | 0.61 |
| HES1                                      | 6  | 1 | 7  | 85.7 | 0.64 |
| HOXA10                                    | 6  | 1 | 7  | 85.7 | 0.65 |
| ASCL1                                     | 6  | 1 | 7  | 85.7 | 0.66 |
| THRA                                      | 6  | 1 | 7  | 85.7 | 0.67 |
| GATA2                                     | 6  | 1 | 7  | 85.7 | 0.69 |
| NR3C1                                     | 29 | 5 | 34 | 85.3 | 0.59 |
| RELB                                      | 46 | 8 | 54 | 85.2 | 0.58 |
| TP63                                      | 23 | 4 | 27 | 85.2 | 0.66 |
| POU2F1                                    | 17 | 3 | 20 | 85   | 0.62 |
| TFAP2B                                    | 11 | 2 | 13 | 84.6 | 0.52 |
| PPARG                                     | 16 | 3 | 19 | 84.2 | 0.52 |
| GATA4                                     | 16 | 3 | 19 | 84.2 | 0.57 |
| ETS1                                      | 26 | 5 | 31 | 83.9 | 0.61 |
| EGR1                                      | 46 | 9 | 55 | 83.6 | 0.59 |
| GATA5                                     | 5  | 1 | 6  | 83.3 | 0.4  |
| TFE3                                      | 5  | 1 | 6  | 83.3 | 0.53 |
| NFIC                                      | 10 | 2 | 12 | 83.3 | 0.55 |
| ZBTB16                                    | 5  | 1 | 6  | 83.3 | 0.56 |
| STAT3                                     | 35 | 7 | 42 | 83.3 | 0.56 |

|                                                                                                                                      |    |    |     |      |      |
|--------------------------------------------------------------------------------------------------------------------------------------|----|----|-----|------|------|
| RUNX1,TR<br>PS1                                                                                                                      | 5  | 1  | 6   | 83.3 | 0.56 |
| NFIA                                                                                                                                 | 5  | 1  | 6   | 83.3 | 0.58 |
| ARNT                                                                                                                                 | 5  | 1  | 6   | 83.3 | 0.58 |
| RORA                                                                                                                                 | 5  | 1  | 6   | 83.3 | 0.59 |
| CEBPB                                                                                                                                | 40 | 8  | 48  | 83.3 | 0.59 |
| STAT5A                                                                                                                               | 10 | 2  | 12  | 83.3 | 0.6  |
| TP73                                                                                                                                 | 10 | 2  | 12  | 83.3 | 0.6  |
| MEIS1                                                                                                                                | 5  | 1  | 6   | 83.3 | 0.61 |
| NKX2-2                                                                                                                               | 5  | 1  | 6   | 83.3 | 0.67 |
| MEF2A,ME<br>F2B,MEF2<br>C,MEF2D                                                                                                      | 5  | 1  | 6   | 83.3 | 0.67 |
| DDIT3                                                                                                                                | 5  | 1  | 6   | 83.3 | 0.68 |
| ZNF143                                                                                                                               | 5  | 1  | 6   | 83.3 | 0.74 |
| E2F1                                                                                                                                 | 24 | 5  | 29  | 82.8 | 0.64 |
| NFATC1                                                                                                                               | 9  | 2  | 11  | 81.8 | 0.65 |
| ETS2                                                                                                                                 | 13 | 3  | 16  | 81.2 | 0.62 |
| USF1                                                                                                                                 | 13 | 3  | 16  | 81.2 | 0.64 |
| NFKB1,REL                                                                                                                            | 17 | 4  | 21  | 81   | 0.57 |
| PPARGC1A                                                                                                                             | 17 | 4  | 21  | 81   | 0.57 |
| RUNX1                                                                                                                                | 21 | 5  | 26  | 80.8 | 0.55 |
| SP1                                                                                                                                  | 82 | 20 | 102 | 80.4 | 0.6  |
| TFAP2C                                                                                                                               | 8  | 2  | 10  | 80   | 0.48 |
| TAF1,TAF1<br>0,TAF11,TA<br>F12,TAF13,<br>TAF15,TAF<br>2,TAF3,TAF<br>4,TAF4B,T<br>AF5,TAF6,T<br>AF7,TAF7L,<br>TAF8,TAF9,<br>TAF9B,TBP | 4  | 1  | 5   | 80   | 0.5  |
| GLI2                                                                                                                                 | 4  | 1  | 5   | 80   | 0.54 |
| FOXO1                                                                                                                                | 16 | 4  | 20  | 80   | 0.56 |
| NFKB1                                                                                                                                | 20 | 5  | 25  | 80   | 0.56 |
| RUNX3                                                                                                                                | 4  | 1  | 5   | 80   | 0.6  |
| HIF1A                                                                                                                                | 28 | 7  | 35  | 80   | 0.6  |
| GABPA,GA<br>BPB1                                                                                                                     | 4  | 1  | 5   | 80   | 0.6  |
| ERG                                                                                                                                  | 8  | 2  | 10  | 80   | 0.64 |
| POU3F1                                                                                                                               | 4  | 1  | 5   | 80   | 0.64 |
| FOXF1                                                                                                                                | 4  | 1  | 5   | 80   | 0.65 |
| NR1D1                                                                                                                                | 4  | 1  | 5   | 80   | 0.65 |
| EBF1                                                                                                                                 | 4  | 1  | 5   | 80   | 0.67 |
| POU2F2                                                                                                                               | 4  | 1  | 5   | 80   | 0.67 |
| KLF5                                                                                                                                 | 4  | 1  | 5   | 80   | 0.69 |
| TEAD4                                                                                                                                | 4  | 1  | 5   | 80   | 0.71 |
| NOTCH1                                                                                                                               | 4  | 1  | 5   | 80   | 0.73 |
| HSF4                                                                                                                                 | 4  | 1  | 5   | 80   | 0.73 |
| RUNX2                                                                                                                                | 15 | 4  | 19  | 78.9 | 0.6  |
| CREB1                                                                                                                                | 33 | 9  | 42  | 78.6 | 0.62 |
| SRF                                                                                                                                  | 18 | 5  | 23  | 78.3 | 0.63 |

|                                                         |    |    |    |      |      |
|---------------------------------------------------------|----|----|----|------|------|
| STAT1                                                   | 25 | 7  | 32 | 78.1 | 0.59 |
| ATF2,FOS,<br>FOSB,FOS<br>L1,FOSL2,J<br>UN,JUNB,J<br>UND | 21 | 6  | 27 | 77.8 | 0.55 |
| RARG                                                    | 7  | 2  | 9  | 77.8 | 0.64 |
| HNF4A                                                   | 21 | 6  | 27 | 77.8 | 0.64 |
| FOXA2                                                   | 13 | 4  | 17 | 76.5 | 0.57 |
| IRF1                                                    | 13 | 4  | 17 | 76.5 | 0.65 |
| SOX6                                                    | 3  | 1  | 4  | 75   | 0.5  |
| FOXO3                                                   | 6  | 2  | 8  | 75   | 0.53 |
| ELF3                                                    | 3  | 1  | 4  | 75   | 0.54 |
| SP3                                                     | 24 | 8  | 32 | 75   | 0.55 |
| PPARA                                                   | 6  | 2  | 8  | 75   | 0.57 |
| NFATC2                                                  | 6  | 2  | 8  | 75   | 0.58 |
| MEN1                                                    | 3  | 1  | 4  | 75   | 0.59 |
| HEY2                                                    | 3  | 1  | 4  | 75   | 0.59 |
| FOXA3                                                   | 3  | 1  | 4  | 75   | 0.63 |
| BHLHE41                                                 | 3  | 1  | 4  | 75   | 0.63 |
| CTNNB1                                                  | 3  | 1  | 4  | 75   | 0.64 |
| TBX3                                                    | 3  | 1  | 4  | 75   | 0.64 |
| KLF15                                                   | 3  | 1  | 4  | 75   | 0.65 |
| CLOCK                                                   | 3  | 1  | 4  | 75   | 0.65 |
| IRF4                                                    | 6  | 2  | 8  | 75   | 0.66 |
| CDX2                                                    | 6  | 2  | 8  | 75   | 0.68 |
| TEAD1                                                   | 3  | 1  | 4  | 75   | 0.68 |
| SNAI2                                                   | 6  | 2  | 8  | 75   | 0.68 |
| NFATC4                                                  | 3  | 1  | 4  | 75   | 0.68 |
| MEF2A                                                   | 3  | 1  | 4  | 75   | 0.7  |
| ARNTL                                                   | 3  | 1  | 4  | 75   | 0.71 |
| NR0B1                                                   | 3  | 1  | 4  | 75   | 0.71 |
| POU3F3                                                  | 3  | 1  | 4  | 75   | 0.72 |
| NFIL3                                                   | 3  | 1  | 4  | 75   | 0.72 |
| MAFB                                                    | 3  | 1  | 4  | 75   | 0.72 |
| PAX8                                                    | 3  | 1  | 4  | 75   | 0.73 |
| DLX2                                                    | 3  | 1  | 4  | 75   | 0.75 |
| AR                                                      | 26 | 9  | 35 | 74.3 | 0.64 |
| SPI1                                                    | 23 | 8  | 31 | 74.2 | 0.56 |
| TCF7L1                                                  | 8  | 3  | 11 | 72.7 | 0.56 |
| ELF5                                                    | 8  | 3  | 11 | 72.7 | 0.57 |
| JUND                                                    | 8  | 3  | 11 | 72.7 | 0.6  |
| LEF1                                                    | 13 | 5  | 18 | 72.2 | 0.57 |
| TFAP2A                                                  | 23 | 9  | 32 | 71.9 | 0.58 |
| TFAP2A,TF<br>AP2B,TFAP<br>2C,TFAP2D<br>,TFAP2E          | 10 | 4  | 14 | 71.4 | 0.58 |
| NFE2L2                                                  | 5  | 2  | 7  | 71.4 | 0.61 |
| NR2F2                                                   | 5  | 2  | 7  | 71.4 | 0.7  |
| HSF1                                                    | 7  | 3  | 10 | 70   | 0.59 |
| PAX5                                                    | 7  | 3  | 10 | 70   | 0.62 |
| MYC                                                     | 37 | 16 | 53 | 69.8 | 0.62 |
| MYCN                                                    | 9  | 4  | 13 | 69.2 | 0.63 |

|                                   |    |    |    |      |      |
|-----------------------------------|----|----|----|------|------|
| POU5F1                            | 23 | 11 | 34 | 67.6 | 0.61 |
| ETS1,ETS2                         | 4  | 2  | 6  | 66.7 | 0.55 |
| HLF                               | 2  | 1  | 3  | 66.7 | 0.55 |
| PPARD                             | 8  | 4  | 12 | 66.7 | 0.55 |
| CREM                              | 6  | 3  | 9  | 66.7 | 0.57 |
| MLXIPL                            | 4  | 2  | 6  | 66.7 | 0.58 |
| FOXP3                             | 2  | 1  | 3  | 66.7 | 0.61 |
| MAZ                               | 4  | 2  | 6  | 66.7 | 0.62 |
| FOSL1                             | 4  | 2  | 6  | 66.7 | 0.62 |
| E2F3                              | 4  | 2  | 6  | 66.7 | 0.63 |
| HAND2                             | 2  | 1  | 3  | 66.7 | 0.63 |
| FOXC2                             | 2  | 1  | 3  | 66.7 | 0.63 |
| ESR1                              | 40 | 20 | 60 | 66.7 | 0.64 |
| MITF                              | 8  | 4  | 12 | 66.7 | 0.65 |
| ZBTB7A                            | 2  | 1  | 3  | 66.7 | 0.65 |
| ESRRA                             | 4  | 2  | 6  | 66.7 | 0.66 |
| THRB                              | 2  | 1  | 3  | 66.7 | 0.66 |
| ATF2,JUN                          | 2  | 1  | 3  | 66.7 | 0.67 |
| NKX2-1                            | 4  | 2  | 6  | 66.7 | 0.67 |
| FOXM1                             | 6  | 3  | 9  | 66.7 | 0.68 |
| ETV4                              | 6  | 3  | 9  | 66.7 | 0.68 |
| TBP                               | 2  | 1  | 3  | 66.7 | 0.68 |
| ATF6                              | 2  | 1  | 3  | 66.7 | 0.71 |
| NCOA3                             | 2  | 1  | 3  | 66.7 | 0.71 |
| NR1H3,RXR<br>A                    | 2  | 1  | 3  | 66.7 | 0.71 |
| MYOG                              | 2  | 1  | 3  | 66.7 | 0.72 |
| HSF2                              | 2  | 1  | 3  | 66.7 | 0.72 |
| OTX2                              | 2  | 1  | 3  | 66.7 | 0.72 |
| TRPS1                             | 2  | 1  | 3  | 66.7 | 0.73 |
| PITX1                             | 2  | 1  | 3  | 66.7 | 0.76 |
| SALL4                             | 2  | 1  | 3  | 66.7 | 0.77 |
| IRF9,STAT<br>1,STAT2              | 2  | 1  | 3  | 66.7 | 0.78 |
| NFKB1,NF<br>KB2,REL,R<br>ELA,RELB | 2  | 1  | 3  | 66.7 | 0.79 |
| HNF1A                             | 13 | 7  | 20 | 65   | 0.67 |
| YY1                               | 16 | 9  | 25 | 64   | 0.57 |
| NFIX                              | 5  | 3  | 8  | 62.5 | 0.62 |
| GABPA                             | 3  | 2  | 5  | 60   | 0.5  |
| NR5A1                             | 3  | 2  | 5  | 60   | 0.56 |
| TCF7                              | 9  | 6  | 15 | 60   | 0.59 |
| E2F7                              | 3  | 2  | 5  | 60   | 0.79 |
| HNF1B                             | 7  | 5  | 12 | 58.3 | 0.6  |
| PBX1                              | 6  | 5  | 11 | 54.5 | 0.62 |
| EOMES                             | 1  | 1  | 2  | 50   | 0.36 |
| FOSL2                             | 2  | 2  | 4  | 50   | 0.41 |
| HOXA5                             | 1  | 1  | 2  | 50   | 0.53 |
| SREBF1                            | 3  | 3  | 6  | 50   | 0.55 |
| HEY1                              | 1  | 1  | 2  | 50   | 0.6  |
| ZBTB17                            | 1  | 1  | 2  | 50   | 0.64 |
| SREBF2                            | 1  | 1  | 2  | 50   | 0.67 |
| TGIF1                             | 1  | 1  | 2  | 50   | 0.67 |

|                |   |   |    |      |      |
|----------------|---|---|----|------|------|
| HOXD13         | 1 | 1 | 2  | 50   | 0.69 |
| IRF3           | 3 | 3 | 6  | 50   | 0.69 |
| TAL1           | 2 | 2 | 4  | 50   | 0.69 |
| SOX10          | 4 | 4 | 8  | 50   | 0.7  |
| NEUROG2        | 1 | 1 | 2  | 50   | 0.72 |
| CTCFL          | 1 | 1 | 2  | 50   | 0.78 |
| CRTC2          | 1 | 1 | 2  | 50   | 0.78 |
| NFKB1,REL<br>A | 1 | 1 | 2  | 50   | 0.88 |
| ELK1           | 7 | 8 | 15 | 46.7 | 0.55 |
| CEBPE          | 3 | 4 | 7  | 42.9 | 0.59 |
| POU3F2         | 2 | 3 | 5  | 40   | 0.65 |
| KLF1           | 1 | 2 | 3  | 33.3 | 0.31 |
| ZNF202         | 1 | 2 | 3  | 33.3 | 0.59 |
| MAF            | 1 | 3 | 4  | 25   | 0.63 |
| PRDM1          | 1 | 3 | 4  | 25   | 0.64 |
| TBX2           | 0 | 1 | 1  | 0    | 0.31 |
| RELA           | 0 | 1 | 1  | 0    | 0.66 |
| POU4F1         | 0 | 1 | 1  | 0    | 0.79 |
| DRAP1          | 0 | 1 | 1  | 0    | 0.93 |

**Supplementary Table S2**

| Enriched gene groups (Gene Ontology Biological Process, except for gene groups annotated with "KEGG") | Probability (BH corrected) |
|-------------------------------------------------------------------------------------------------------|----------------------------|
| <b>Enrichments of target of activity modelled TFs (TOA)</b>                                           |                            |
| development                                                                                           | 6.94e-021                  |
| morphogenesis                                                                                         | 2.27e-019                  |
| regulation of transcription, DNA-dependent                                                            | 4.42e-018                  |
| organogenesis                                                                                         | 8.29e-018                  |
| regulation of transcription                                                                           | 1.33e-017                  |
| transcription, DNA-dependent                                                                          | 4.14e-017                  |
| transcription                                                                                         | 3.35e-015                  |
| <b>KEGG Cell cycle - Homo sapiens</b>                                                                 | 6.79e-008                  |
| <b>KEGG Cell Growth and Death - Homo sapiens</b>                                                      | 1.96e-006                  |
| response to external stimulus                                                                         | 5.94e-006                  |
| nucleotide and nucleic acid metabolism                                                                | 1.54e-005                  |
| cell communication                                                                                    | 3.35e-005                  |
| defense response                                                                                      | 3.53e-005                  |
| <b>immune response</b>                                                                                | 4.12e-005                  |
| KEGG Complement andcoagulation cascades - Homo sapiens                                                | 8.05e-005                  |
| <b>KEGG Immune System - Homo sapiens</b>                                                              | 8.05e-005                  |
| response to biotic stimulus                                                                           | 1.13e-004                  |
| antigen presentation                                                                                  | 1.83e-004                  |
| cellular process                                                                                      | 2.45e-004                  |
| cell surface receptor linked signal transduction                                                      | 6.63e-004                  |
| regulation of cellular process                                                                        | 6.63e-004                  |

|                                                                                                         |           |
|---------------------------------------------------------------------------------------------------------|-----------|
| regulation of biological process                                                                        | 1.27e-003 |
| pattern specification                                                                                   | 1.80e-003 |
| antigen processing                                                                                      | 4.31e-003 |
| regulation of transcription from Pol II promoter                                                        | 6.17e-003 |
| neurogenesis                                                                                            | 6.17e-003 |
| negative regulation of transcription, DNA-dependent                                                     | 6.17e-003 |
| cell adhesion                                                                                           | 6.36e-003 |
| perception of biotic stimulus                                                                           | 6.76e-003 |
| perception of pest/pathogen/parasite                                                                    | 6.76e-003 |
| blood coagulation                                                                                       | 7.56e-003 |
| histogenesis and organogenesis                                                                          | 7.62e-003 |
| negative regulation of transcription from Pol II promoter                                               | 7.62e-003 |
| skeletal development                                                                                    | 7.62e-003 |
| transcription from Pol II promoter                                                                      | 8.34e-003 |
| hemostasis                                                                                              | 1.03e-002 |
| histogenesis                                                                                            | 1.03e-002 |
| cell proliferation                                                                                      | 1.15e-002 |
| embryonic development                                                                                   | 1.41e-002 |
| response to pest/pathogen/parasite                                                                      | 1.41e-002 |
| regulation of cell proliferation                                                                        | 1.41e-002 |
| cell-cell signaling                                                                                     | 1.70e-002 |
| antigen processing, exogenous antigen via MHC class II                                                  | 1.70e-002 |
| antigen presentation, exogenous antigen                                                                 | 1.70e-002 |
| striated muscle contraction                                                                             | 2.06e-002 |
| KEGG Circadian rhythm - Homo sapiens                                                                    | 2.13e-002 |
| KEGG Behavior - Homo sapiens                                                                            | 2.13e-002 |
| rhythmic behavior                                                                                       | 2.13e-002 |
| regulation of cell growth                                                                               | 2.53e-002 |
| synapse organization and biogenesis                                                                     | 2.85e-002 |
| synaptogenesis                                                                                          | 2.85e-002 |
| embryonic development (sensu Animalia)                                                                  | 3.18e-002 |
| cell motility                                                                                           | 3.75e-002 |
| circadian rhythm                                                                                        | 3.75e-002 |
| negative regulation of transcription                                                                    | 3.81e-002 |
| response to light                                                                                       | 4.59e-002 |
| myeloid blood cell differentiation                                                                      | 4.65e-002 |
| signal transduction                                                                                     | 4.65e-002 |
| extracellular structure organization and biogenesis                                                     | 4.65e-002 |
| extracellular matrix organization and biogenesis                                                        | 4.65e-002 |
| muscle development                                                                                      | 4.74e-002 |
| osteoclast differentiation                                                                              | 4.86e-002 |
| gonad development                                                                                       | 4.86e-002 |
|                                                                                                         |           |
| <b>Enrichments of targets of gene expression modelled TFs (TOGs)</b>                                    |           |
| lipid biosynthesis                                                                                      | 6.02e-003 |
| cholesterol biosynthesis                                                                                | 2.89e-002 |
| sterol biosynthesis                                                                                     | 2.89e-002 |
|                                                                                                         |           |
| <b>Enrichments of target genes of TFs which activity didn't correlate the gene expression of the TF</b> |           |
| transmission of nerve impulse                                                                           | 8.64e-003 |
| synaptic transmission                                                                                   | 8.64e-003 |
